# 1 **Predictive Neural Computations Support Spoken Word**

## 2 **Recognition: Evidence from MEG and Competitor Priming**

3

### 4 **Authors and affiliation**

5 Yingcan Carol Wang<sup>1</sup>, Ediz Sohoglu<sup>2</sup>, Rebecca A. Gilbert<sup>1</sup>, Richard N. Henson<sup>1</sup>,  
6 Matthew H. Davis<sup>1</sup>

7 <sup>1</sup>MRC Cognition and Brain Sciences Unit, University of Cambridge, 15 Chaucer Road,  
8 Cambridge, CB2 7EF, UK

9 <sup>2</sup> School of Psychology, University of Sussex, Brighton, BN1 9RH, UK

10

### 11 **Corresponding authors and emails**

12 Matthew H. Davis: [matt.davis@mrc-cbu.cam.ac.uk](mailto:matt.davis@mrc-cbu.cam.ac.uk)

13 Yingcan Carol Wang: [carol.wang@mrc-cbu.cam.ac.uk](mailto:carol.wang@mrc-cbu.cam.ac.uk)

14

### 15 **Conflict of interest statement**

16 The authors declare no competing financial interests.

17

### 18 **Acknowledgments**

19 The research was supported by the UK Medical Research Council (SUAG/044 &  
20 SUAG/046 G101400) and by a China Scholarship Council award to Yingcan Carol  
21 Wang. We are grateful to Clare Cook, Ece Kocagoncu and Tina Emery for their  
22 assistance with data collection, and also to Olaf Hauk for his advice on MEG data  
23 analysis.

24

25

## 26 **Abstract**

27 Human listeners achieve quick and effortless speech comprehension through  
28 computations of conditional probability using Bayes rule. However, the neural  
29 implementation of Bayesian perceptual inference remains unclear. Competitive-  
30 selection accounts (e.g. TRACE) propose that word recognition is achieved through  
31 direct inhibitory connections between units representing candidate words that share  
32 segments (e.g. *hygiene* and *hijack* share /haidʒ/). Manipulations that increase lexical  
33 uncertainty should increase neural responses associated with word recognition when  
34 words cannot be uniquely identified. In contrast, predictive-selection accounts (e.g.  
35 Predictive-Coding) proposes that spoken word recognition involves comparing heard  
36 and predicted speech sounds and using prediction error to update lexical  
37 representations. Increased lexical uncertainty in words like *hygiene* and *hijack* will  
38 increase prediction error and hence neural activity only at later time points when  
39 different segments are predicted. We collected MEG data from male and female  
40 listeners to test these two Bayesian mechanisms and used a competitor priming  
41 manipulation to change the prior probability of specific words. Lexical decision  
42 responses showed delayed recognition of target words (*hygiene*) following  
43 presentation of a neighbouring prime word (*hijack*) several minutes earlier. However,  
44 this effect was not observed with pseudoword primes (*higent*) or targets (*hijure*).  
45 Crucially, MEG responses in the STG showed greater neural responses for word-  
46 primed words *after* the point at which they were uniquely identified (after /haidʒ/ in  
47 *hygiene*) but not *before* while similar changes were again absent for pseudowords.  
48 These findings are consistent with accounts of spoken word recognition in which  
49 neural computations of prediction error play a central role.

50

## 51 **Significance Statement**

52 Effective speech perception is critical to daily life and involves computations that  
53 combine speech signals with prior knowledge of spoken words; that is, Bayesian  
54 perceptual inference. This study specifies the neural mechanisms that support spoken  
55 word recognition by testing two distinct implementations of Bayes perceptual inference.  
56 Most established theories propose direct competition between lexical units such that  
57 inhibition of irrelevant candidates leads to selection of critical words. Our results  
58 instead support predictive-selection theories (e.g. Predictive-Coding): by comparing  
59 heard and predicted speech sounds, neural computations of prediction error can help  
60 listeners continuously update lexical probabilities, allowing for more rapid word  
61 identification.

62

## 63 **Introduction**

64 In daily conversation, listeners identify ~200 words/minute (Tauroza & Allison, 1990)  
65 from a vocabulary of ~40,000 words (Brysbaert et al., 2016). This means that they  
66 must recognise 3-4 words/second and constantly select from sets of transiently  
67 ambiguous words (e.g. *hijack* and *hygiene* both begin with /haidʒ/). Although it is  
68 recognised that humans achieve word recognition by combining current speech input  
69 with its prior probability using Bayes theorem (Norris & McQueen, 2008; Davis &  
70 Scharenborg, 2016; Gwilliams & Davis, in press), the underlying neural  
71 implementation of Bayesian perceptual inference remains unclear (Aitchison &  
72 Lengeyl, 2017).

73 Here, we test two computational accounts of spoken word recognition that both  
74 implement Bayes rules. In competitive-selection accounts (e.g. TRACE, McClelland &

75 Elman, 1986, Figure 1A), word recognition is achieved through within-layer lateral  
76 inhibition between neural units representing similar words. By this view, *hijack* and  
77 *hygiene* compete for identification such that an increase in probability for one word  
78 inhibits units representing other similar-sounding words. Conversely, predictive-  
79 selection accounts (e.g. Predictive-Coding, Davis & Sohoglu, 2020) suggest that word  
80 recognition is achieved through computations of prediction error (Figure 1D). On  
81 hearing transiently ambiguous speech like /haidʒ/, higher-level units representing  
82 matching words make contrasting predictions (/æk/ for *hijack*, /i:n/ for *hygiene*).  
83 Prediction error (the difference between sounds predicted and actually heard) provides  
84 a signal to update word probabilities such that the correct word can be selected.

85 In this study, we used the competitor priming effect (Monsell & Hirsh, 1998;  
86 Marsolek, 2008), which is directly explicable in Bayesian terms, i.e. the recognition of  
87 a word (*hygiene*) is delayed if the prior probability of a competitor word (*hijack*) has  
88 been increased due to an earlier exposure. This delay could be due to increased lateral  
89 inhibition (competitive-selection) or greater prediction error (predictive-selection).  
90 Thus, similar behavioural effects of competitor priming are predicted by two distinct  
91 neural computations (Spratling, 2008). To distinguish them, it is critical to investigate  
92 neural data that reveals the direction, timing and level of processing at which  
93 competitor priming modulates neural responses. Existing neural data remains  
94 equivocal with some evidence consistent with competitive-selection (Bozic et al., 2010;  
95 Okada & Hickok, 2006), predictive-selection (Gagnepain et al, 2012), or both  
96 mechanisms (Brodbeck et al., 2018; Donhauser et al., 2019). We followed these  
97 studies in correlating two computational measures with neural activity: lexical entropy  
98 (competitive-selection) and segment prediction error (or phoneme surprisal, for  
99 predictive-selection).

100           Here, we used MEG to record the location and timing of neural responses during  
101 spoken words recognition in a competitor priming experiment. Pseudowords (e.g.  
102 *hijure*) were included in our analysis to serve as a negative control for competitor  
103 priming, since existing research found that pseudowords neither produce nor show  
104 this effect (Monsell & Hirsh, 1998). We compared items with the same initial segments  
105 (words *hygiene*, *hijack*, pseudowords *hijure*, *higent* share /haidʒ/) and measured  
106 neural and behavioural effects concurrently to link these two effects for single trials.

107           While lexical entropy and prediction error are correlated for natural speech, this  
108 competitor priming manipulation allows us to make differential predictions as illustrated  
109 in Figure 1. Specifically: (1) before the deviation point (DP, the point at which similar-  
110 sounding words diverge), competitor priming increases lexical entropy and hence  
111 neural responses (Figure 1B&C Pre-DP). Such responses might be observed in  
112 inferior frontal regions (Zhuang et al., 2011) and posterior temporal regions  
113 (Prabhakaran et al., 2006). However, prediction error will be reduced for pre-DP  
114 segments, since heard segments are shared and hence more strongly predicted  
115 (Figure 1E&F Pre-DP). This should be reflected in the superior temporal gyrus (STG,  
116 Sohoglu & Davis, 2016). (2) After the DP, predictive-selection but not competitive-  
117 selection accounts propose that pseudowords evoke greater signals in the left-STG,  
118 since they evoke maximal prediction errors (Figure 1E&F Pseudoword, Post-DP). (3)  
119 Furthermore, in predictive-selection theories, competitor priming is associated with an  
120 increased STG response to post-DP segments due to enhanced prediction error  
121 caused by mismatch between primed words (predictions) and heard speech (Figure  
122 1E&F Word, Post-DP).

123

124

## 125 **Materials and Methods**

### 126 **Participants**

127 Twenty-four (17 female, 7 male) right-handed, native English speakers were tested  
128 after giving informed consent under a process approved by the Cambridge Psychology  
129 Research Ethics Committee. This sample size was selected based on previous studies  
130 measuring similar neural effects with the same MEG system (Gagnepain et al. 2012;  
131 Sohoglu & Davis, 2016; Sohoglu et al. 2012, etc.). All participants were aged 18-40  
132 years and had no history of neurological disorder or hearing impairment based on self-  
133 report. Two participants' MEG data were excluded from subsequent analyses  
134 respectively due to technical problems and excessive head movement, resulting in 22  
135 participants in total. All recruited participants received monetary compensation.

136

### 137 **Experimental Design**

138 To distinguish competitive- and predictive-selection accounts, we manipulated  
139 participants' word recognition process by presenting partially mismatched auditory  
140 stimuli prior to targets. Behavioural responses and MEG signals were acquired  
141 simultaneously. Prime and target stimuli pairs form a repeated measures design with  
142 two factors (lexicality and prime type). The lexicality factor has 2 levels: word and  
143 pseudoword, while the prime type factor contains 3 levels: unprimed, primed by same  
144 lexical status, primed by different lexical status. Hence the study is a factorial 2 x 3  
145 design with 6 conditions: unprimed word (*hijack*), word-primed word (*hijack-hygiene*),  
146 pseudoword-primed word (*basef-basis*), unprimed pseudoword (*letto*), pseudoword-  
147 primed pseudoword (*letto-lettan*), word-primed pseudoword (*boycott-boymid*). Prime-  
148 target pairs were formed only by stimuli sharing the same initial segments. Items in  
149 the two unprimed conditions served as prime items in other conditions and they were

150 compared with target items (Figure 2A).

151 The experiment used a lexical decision task (Figure 2B) implemented in  
152 MATLAB through Psychtoolbox-3 (Kleiner et al. 2007), during which participants heard  
153 a series of words and pseudowords while making lexicality judgments to each stimulus  
154 by pressing buttons using their left index and middle fingers only, with the index finger  
155 pressing one button indicating word and the middle finger pressing the other button  
156 indicating pseudoword. 344 trials of unique spoken items were presented every ~3  
157 seconds in two blocks of 172 trials, each block lasting approximately 9 minutes. Each  
158 prime-target pair was separated by 20 to 76 trials of items that do not start with the  
159 same speech sounds, resulting in a relatively long delay of ~1-4 minutes between  
160 presentations of phonologically-related items. This delay was chosen based on  
161 Monsell and Hirsh (1998), who suggest that it prevents strategic priming effects (Norris  
162 et al. 2002). Stimuli from each of the quadruplets were Latin-square counterbalanced  
163 across participants, i.e. stimulus quadruplets that appeared in one condition for one  
164 participant were allocated to another condition for another participant. The stimulus  
165 sequences were pseudo-randomised using Mix software (van Casteren & Davis,  
166 2006), so that the same type of lexical status (word/pseudoword) did not appear  
167 successively on more than 4 trials.

168

## 169 **Stimuli**

170 The stimuli consisted of 160 sets of four English words and pseudowords, with  
171 durations ranging from 372 to 991 ms ( $M = 643$ ,  $SD = 106$ ). Each set contained 2  
172 words (e.g. *letter*, *lettuce*) and 2 phonotactically-legal pseudowords (e.g. *letto*, *lettan*)  
173 that share the same initial segments (e.g. /let/) but diverge immediately afterwards.

174 We used polysyllabic word pairs ( $M_{\text{syllable}} = 2.16$ ,  $SD_{\text{syllable}} = 0.36$ ) instead of

175 monosyllabic ones in our experiments so as to identify a set of optimal lexical  
176 competitors that are similar to their prime yet dissimilar from all other items. All words  
177 were selected from the CELEX database (Baayen et al., 1993). Their frequencies were  
178 taken from SUBTLEX UK corpus (Van Heuven et al., 2014) and restricted to items  
179 under 5.5 based on log frequency per million word (Zipf scale, Van Heuven et al.,  
180 2014). In order to ensure that any priming effect was caused purely by phonological  
181 but not semantic similarity, we also checked that all prime and target word pairs have  
182 a semantic distance of above 0.7 on a scale from 0 to 1 based on the Snaut database  
183 of semantic similarity scores (Mandera et al., 2017), such that morphological relatives  
184 (e.g. darkly/darkness) were excluded.

185 All spoken stimuli were recorded onto a Marantz PMD670 digital recorder by a  
186 male native speaker of southern British English in a sound-isolated booth at a  
187 sampling rate of 44.1 kHz. Special care was taken to ensure that shared segments of  
188 stimuli were pronounced identically (any residual acoustic differences were  
189 subsequently eliminated using audio morphing as described below).

190 The point when items within each quadruplet begin to acoustically differ from  
191 each other is the deviation point (hereafter DP, see Figure 3A). Pre-DP length ranged  
192 from 150 to 672 ms ( $M = 353$ ,  $SD = 96$ ), while post-DP length ranged from 42 to 626  
193 ms ( $M = 290$ ,  $SD = 111$ , see Figure 3B). Epochs of MEG data were time-locked to the  
194 DP. Using phonetic transcriptions (phonDISC) in CELEX, the location of the DP was  
195 decided based on the phoneme segment at which items within each quadruplet set  
196 diverge ( $M_{\text{seg}}=3.53$ ,  $SD_{\text{seg}}=0.92$ ). To determine when in the speech files corresponds  
197 to the onset of the first post-DP segment, we aligned phonetic transcriptions to  
198 corresponding speech files using the WebMAUS forced alignment service (Kisler et  
199 al., 2017; Schiel, 1999). In order to ensure that the pre-DP portion of the waveform



200 was acoustically identical, we cross-spliced the pre-DP segments of the 4 stimuli within  
201 each quadruplet and conducted audio morphing to combine the syllables using  
202 STRAIGHT (Kawahara, 2006) implemented in MATLAB. This method decomposes  
203 speech signals into source information and spectral information, and permits high  
204 quality speech re-synthesis based on modified versions of these representations. This  
205 enables flexible averaging and interpolation of parameter values that can generate  
206 acoustically intermediate speech tokens (see Rogers & Davis, 2017, for example). In  
207 the present study, this method enabled us to present speech tokens with entirely  
208 ambiguous pre-DP segments, and combine these with post-DP segments without  
209 introducing audible discontinuities or other degradation in the speech tokens. This way,  
210 phonological co-articulation in natural speech was reduced to the lowest level possible  
211 at the DP, hence any cross-stimuli divergence evoked in neural responses can only  
212 be caused by post-DP deviation.

213

#### 214 **Post-test Gating Study**

215 As encouraged by a reviewer, we conducted a post-test perceptual experiment using  
216 a gating task in order to confirm that the cross-splicing and morphing of our stimuli  
217 worked as expected. This experiment used a gating task implemented in JavaScript  
218 through JSpsych (de Leeuw, 2015). During the experiment, auditory segments of all  
219 160 pairs of words used in the MEG study were played. Twenty British English  
220 speakers were recruited through Prolific Academic online with monetary  
221 compensation. The sample size was selected based on a similar gating study  
222 conducted by Davis et al. (2002). Participants were evenly divided into two groups,  
223 one group were presented with 160 stimuli words with different pre-DP segments (e.g.  
224 *hygiene*), while the other group were presented with the other paired 160 stimuli (e.g.

225 *hijack*). Therefore, participants only ever heard one of the two items in each pair.  
226 Stimuli segments of each word item consist of the pre-DP segment and, depending on  
227 the stimuli length, also longer segments that are 75ms, 150ms, 225ms and 300ms  
228 post DP. The segments of each word were presented in a gating manner, with the  
229 shortest segment played the first and the full item played at the end. After hearing  
230 each segment (e.g. /haidʒ/), participants were also presented with the writing of the  
231 word (e.g. *hygiene*) that contained the segment and the other paired word that shared  
232 the same pre-DP segment (e.g. *hijack*) on the screen. We asked the participants to  
233 choose which item the auditory segment matches and indicate their confidence from  
234 a rating scale of 1 to 6, with 1 representing being very confident that the item is the  
235 one on the left and 6 representing being very confident that the item is the one on the  
236 right, while 3 and 4 representing guessing the possible item. In order to avoid potential  
237 practice effect, we also added 40 filler stimuli that are identifiable on initial presentation.

238 Given our goal of assessing whether there is any information to distinguish the  
239 words prior to the divergence point, we needed to adopt an analysis approach that  
240 could confirm the null hypothesis that no difference exists between perception of the  
241 shared first syllable of word pairs like *hijack* and *hygiene*. We therefore analysed the  
242 results using Bayesian methods which permit this inference. Participants' response  
243 accuracy was analysed using mixed-effect logistic regression and confidence rating  
244 scores were analysed using mixed-effect linear regression using the *brms* package  
245 (Bürkner, 2017) implemented in R. Response scores were computed in a way such  
246 that correct and most confident responses were scored 1, while incorrect and most  
247 confident responses were scored 6 and so on. Participants and items were included  
248 as random factors of the models and there was no fixed factor since we are only  
249 interested in the intercepts, whose estimates indicate the logit transformed proportion

250 of correctness in the logistic model and the mean rating in the linear model respectively.  
251 We chose weakly informative priors for each model and conducted Bayes Factor  
252 analyses through the Savage-Dickey density ratio method (Wagenmakers et al., 2010).  
253 Model estimate, standard error, lower and upper boundary of 95% credible interval (CI)  
254 are also reported.

255 When checking our data, we found that 16 pairs of word items were not morphed  
256 correctly, hence the spectral information of the pre-DP segments of these word pairs  
257 were not exactly the same and some of them diverged acoustically before the DP due  
258 to coarticulation. Therefore, we excluded these items from analyses of the gating data  
259 and confirmed that excluding these items did not modify the interpretation or  
260 significance of the MEG or behavioral results reported in the paper.

261 As shown in Figure 3C, we found that when gating segments ended at the DP,  
262 Bayes factor provides strong evidence in favour of the null hypothesis, chance-level  
263 accuracy (i.e. proportion of correct responses is 0.5),  $\beta = 0.04$ ,  $SE = 0.08$ ,  $ICI = -0.11$ ,  
264  $uCI = 0.20$ ,  $BF_{01} = 23.04$ . This indicates that participants could not predict the full  
265 stimuli based on hearing the pre-DP segments. On the other hand, the Bayes factor  
266 at later alignment points is close to 0, providing extremely strong evidence for the  
267 alternative hypothesis that the proportion of correct responses is higher than 0.5 (75ms  
268 post-DP:  $\beta = 3.41$ ,  $SE = 0.22$ ,  $ICI = 2.99$ ,  $uCI = 3.85$ ,  $BF_{01} < 0.01$ ; 150ms post-DP:  $\beta$   
269  $= 6.26$ ,  $SE = 0.56$ ,  $ICI = 5.24$ ,  $uCI = 7.41$ ,  $BF_{01} < 0.01$ ; 225ms post-DP:  $\beta = 7.39$ ,  $SE$   
270  $= 1.02$ ,  $ICI = 5.65$ ,  $uCI = 9.72$ ,  $BF_{01} < 0.01$ ; 300ms post-DP:  $\beta = 8.04$ ,  $SE = 1.88$ ,  $ICI$   
271  $= 4.99$ ,  $uCI = 12.32$ ,  $BF_{01} < 0.01$ ). Figure 3D shows that, with the gating segment  
272 becoming longer, the rating scores gradually reduce (lower scores indicating more  
273 accurate and more confident identification). We examined whether the mean score at  
274 the DP is equal to 3.5 (i.e. chance performance) and found strong evidence supporting

275 the null hypothesis,  $\beta = -0.02$ ,  $SE = 0.04$ ,  $ICI = -0.10$ ,  $uCI = 0.06$ ,  $BF_{01} = 21.79$ , which  
276 is consistent with the accuracy results. Furthermore, in order to refine the estimate of  
277 the time point at which participants recognise the stimuli with enough confidence, we  
278 also investigated at what alignment point is there evidence showing the mean score  
279 lower than 2 (i.e. participants indicating more confident identification). We found  
280 moderate evidence supporting the null hypothesis (mean score equals to 2) at 75ms  
281 post-DP ( $\beta = -0.09$ ,  $SE = 0.08$ ,  $ICI = -0.25$ ,  $uCI = 0.07$ ,  $BF_{01} = 6.07$ ), but extremely  
282 strong evidence in favour of the alternative hypothesis at 150ms post-DP ( $\beta = -0.71$ ,  
283  $SE = 0.05$ ,  $ICI = -0.79$ ,  $uCI = 0.62$ ,  $BF_{01} < 0.01$ ). These results show that critical  
284 acoustic information that supports confident word recognition arrives between 75ms  
285 and 150ms post-DP.

286 Overall, the post-test gating study confirmed that the pre-DP segments of  
287 correctly morphed stimuli are not distinguishable within each stimuli set. However,  
288 since we found items that were not correctly morphed during this control study, we did  
289 a thorough check of our stimuli and identified all the problematic items (16 words and  
290 12 pseudowords), which resulted in 8.68% of all trials presented in the MEG study. In  
291 order to double check our MEG study results, we then removed all these problematic  
292 trials from the data and reanalysed the data using the same methods as described in  
293 the method section. Fortunately, we did not find any inconsistent pattern or  
294 significance in our behavioural or neural results compared to those reported with all  
295 trials included. Therefore, we kept the original MEG and behavioural results with all  
296 items included in this paper.

297

## 298 **Behavioural Data Analyses**

299 Response times (RTs) were measured from the onset of the stimuli and inverse-  
300 transformed so as to maximise the normality of the data and residuals; Figures report  
301 untransformed response times for clarity. Inverse-transformed RTs and error rates  
302 were analysed using linear and logistic mixed-effect models respectively using the  
303 lme4 package in R (Bates et al. 2014). Lexicality (word, pseudoword) and prime type  
304 (unprimed, primed by same lexical status, primed by different lexical status) were fixed  
305 factors, while participant and item were random factors. Maximal models accounting  
306 for all random effects were attempted wherever possible, but reduced random effects  
307 structures were applied when the full model did not converge (Barr et al., 2013).  
308 Likelihood-ratio tests comparing the full model to a nested reduced model using the  
309 Chi-Square distribution were conducted to evaluate main effects and interactions.  
310 Significance of individual model coefficients were obtained using  $t$  (reported by linear  
311 mixed-effect models) or  $z$  (reported by logistic mixed-effect models) statistics in the  
312 model summary. One-tailed  $t$  statistics for RTs are also reported for two planned  
313 contrasts: (1) word-primed versus unprimed conditions for word targets, and (2) word-  
314 primed versus pseudoword-primed conditions for word targets.

315 When assessing priming effects, we excluded data from target trials in which the  
316 participant made an error in the corresponding prime trial, because it is unclear  
317 whether such target items will be affected by priming given that the prime word was  
318 not correctly identified. In addition, three trials with RTs shorter than the average pre-  
319 DP length (353ms) were removed from further analysis, since responses before words  
320 and pseudowords acoustically diverge are too quick to be valid lexical decision  
321 responses.

322

323 **MEG Data Acquisition, Processing and Analyses**

324 Magnetic fields were recorded with a VectorView system (Elekta Neuromag) which  
325 contains a magnetometer and two orthogonal planar gradiometers at each of 102  
326 locations within a hemispherical array around the head. Although electric potentials  
327 were recorded simultaneously using 68 Ag-AgCl electrodes according to the extended  
328 10-10% system, these EEG data were excluded from further analysis due to excessive  
329 noise. All data were digitally sampled at 1 kHz. Head position were monitored  
330 continuously using five head-position indicator (HPI) coils attached to the scalp.  
331 Vertical and horizontal electro-oculograms were also recorded by bipolar electrodes.  
332 A 3D digitizer (FASTRAK; Polhemus, Inc.) was used to record the positions of three  
333 anatomical fiducial points (the nasion, left and right preauricular points), HPI coils and  
334 evenly distributed head points for use in source reconstruction.

335 MEG Data were preprocessed using the temporal extension of Signal Source  
336 Separation in MaxFilter software (Elekta Neuromag) to reduce noise sources,  
337 normalise the head position over blocks and participants to the sensor array and  
338 reconstruct data from bad MEG sensors. Subsequent processing was conducted in  
339 SPM12 (<https://www.fil.ion.ucl.ac.uk/spm/>) and FieldTrip  
340 (<http://www.fieldtriptoolbox.org/>) software implemented in MATLAB. The data were  
341 epoched from -1100 to 2000ms time-locked to the DP and baseline corrected relative  
342 to the -1100 to -700ms prior to the DP, which is a period before the onset of speech  
343 for all stimuli (Figure 1C). Low-pass filtering to 40 Hz was conducted both before and  
344 after robust averaging across trials (Litvak et al., 2011). A time window of -150 to 0ms  
345 was defined for pre-DP comparisons based on the shortest pre-DP stimuli length. A  
346 broad window of 0 to 1000ms was defined for post-DP comparisons, which covered  
347 the possible period for lexicality and prime effects. After averaging over trials, an extra

348 step was taken to combine the gradiometer data from each planar sensor pair by  
349 taking the root-mean square (RMS) of the two amplitudes.

350         Sensor data from magnetometers and gradiometers were analysed separately.  
351 We converted the sensor data into 3D images (2D sensor x time) and performed  $F$   
352 tests for main effects across sensors and time (the term “sensors” denotes interpolated  
353 sensor locations in 2D image space). Reported effects were obtained with a cluster-  
354 defining threshold of  $p < .001$ , and significant clusters identified as those whose extent  
355 (across space and time) survived  $p < 0.05$  FWE-correction using Random Field Theory  
356 (Kilner & Friston, 2010). Region of interest (ROI) analyses for the priming effect were  
357 then conducted over sensors and time windows that encompassed the significant  
358 pseudoword>word cluster, orthogonal to priming effects. When plotting waveforms  
359 and topographies, data are shown for sensors nearest to the critical points in 2D image  
360 space.

361         Apart from the two planned contrasts mentioned above (see Behavioural Data  
362 Analyses), which were applied to post-DP analysis, one-tailed  $t$  statistics was also  
363 reported on the pre-DP planned contrast between unprimed and word-primed items.

364

### 365 **Source Reconstruction**

366 In order to determine the underlying brain sources underlying the sensor-space effects,  
367 source reconstruction was conducted using SPM’s Parametric Empirical Bayes  
368 framework (Henson et al., 2011). To begin with, we obtained T1-weighted structural  
369 MRI (sMRI) scans from each participant on a 3T Prisma system (Siemens, Erlangen,  
370 Germany) using an MPRAGE sequence. The scan images were segmented and  
371 normalised to an MNI template brain in MNI space. The inverse of this spatial  
372 transformation was then used to warp canonical meshes derived from that template

373 brain back to each subject's MRI space (Mattout et al., 2007). Through this procedure,  
374 canonical cortical meshes containing 8196 vertices were generated for the scalp and  
375 skull surfaces. We coregistrated the MEG sensor data into the sMRI space for each  
376 participant by using their respective fiducials, sensor positions and head-shape points  
377 (with nose points removed due to the absence of the nose on the T1-weighted MRI).  
378 Using the single shell model, the lead field matrix for each sensor was computed for a  
379 dipole at each canonical cortical mesh vertex, oriented normal to the local curvature  
380 of the mesh.

381 Source inversion was performed with all conditions pooled together using the  
382 'IID' solution, equivalent to classical minimum norm, fusing the magnetometer and  
383 gradiometer data (Henson et al, 2011). The resulting inversion was then projected  
384 onto wavelets spanning frequencies from 1 to 40 Hz and from -150 to 0ms time  
385 samples for pre-DP analysis and 400 to 900ms for post-DP analysis. This post-DP  
386 time window was defined by overlapping temporal extent of the pseudoword > word  
387 cluster between gradiometers and magnetometers. The total energy within these time-  
388 frequency windows was summarised by taking the sum of squared amplitudes, which  
389 was then written to 3D images in MNI space.

390 Reported effects for source analyses were obtained with a cluster-defining  
391 threshold of  $p < 0.05$  (FWE-corrected). And as in sensor space, ROI analyses were  
392 conducted over significant sensors and time windows from the orthogonal  
393 pseudoword>word cluster. Factorial ANOVA were carried out on main effects and one-  
394 tailed paired *t*-tests on planned contrasts (see MEG Data Acquisition and Processing).

395

396

397



## 398 **Results**

### 399 **Behaviour**

400 **Response Times.** As shown in Figure 4A, factorial analysis of lexicality (word,  
401 pseudoword) and prime type (unprimed, primed by same lexical status, primed by  
402 different lexical status) indicated a significant main effect of lexicality, in which RTs for  
403 pseudowords were significantly longer than for words,  $X^2(3) = 23.60$ ,  $p < .001$ . In  
404 addition, there was a significant interaction between lexicality and prime type,  $X^2(2) =$   
405  $10.73$ ,  $p = .005$ . This interaction was followed up by two separate one-way models for  
406 words and pseudowords, which showed a significant effect of prime type for words,  
407  $X^2(2) = 10.65$ ,  $p = .005$ , but not for pseudowords,  $X^2(2) = 1.62$ ,  $p = .445$ . Consistent  
408 with the competitor priming results from Monsell and Hirsh (1998), words that were  
409 primed by another word sharing the same initial segments were recognised  
410 significantly more slowly than unprimed words (for mean raw RTs see Fig 3A),  $\beta =$   
411  $0.02$ ,  $SE = 0.01$ ,  $t(79.69) = 3.33$ ,  $p < .001$ , and more slowly than pseudoword-primed  
412 words,  $\beta = 0.02$ ,  $SE = 0.01$ ,  $t(729.89) = 2.37$ ,  $p = .018$ . As mentioned earlier (see  
413 Introduction), both competitive- and predictive-selection models predicted longer  
414 response times to word-primed target words compared to unprimed words, it is hence  
415 critical to distinguish the two accounts through further investigation of the MEG  
416 responses.

417 **Accuracy.** Figure 4B shows that there was a trend towards more lexical decision  
418 errors in response to words than to pseudowords, although this lexicality effect was  
419 marginal,  $X^2(3) = 7.31$ ,  $p = .063$ . The error rates for words and pseudowords were also  
420 affected differently by priming, as indicated by a significant interaction between  
421 lexicality and prime type,  $X^2(2) = 6.08$ ,  $p = .048$ . Follow-up analyses using two separate  
422 models for each lexicality type showed there was a main effect of prime type for words,

423  $\chi^2(2) = 13.95, p < .001$ , but not for pseudowords,  $\chi^2(2) = 1.93, p = .381$ . Since we had  
424 not anticipated these priming effects on accuracy, post-hoc pairwise  $z$  tests were  
425 Bonferroni corrected for multiple comparisons. These showed that pseudoword  
426 priming reliably increased the error rate compared to the unprimed condition,  $\beta = 1.68$ ,  
427  $SE = 0.54, z = 3.14, p = .005$ , and to the word-primed condition,  $\beta = 2.74, SE = 0.89$ ,  
428  $z = 3.07, p = .007$ . Although no specific predictions on accuracy were made a priori by  
429 either competitive- or predictive-selection model, it is worth noting that participants  
430 might have expected pseudowords to be repeated given the increased error rate of  
431 responses to pseudoword-primed target words.

432

### 433 **MEG**

434 In order to explore the impact of lexicality and competitor priming on neural responses  
435 to critical portions of speech stimuli, both before and after they diverge from each other,  
436 MEG responses were time-locked to the DP. All reported effects are family-wise error  
437 (FWE)-corrected at cluster level for multiple comparisons across scalp locations and  
438 time at a threshold of  $p < 0.05$ . We reported data from gradiometers, magnetometers  
439 and source space wherever possible, since sensor  $\times$  time analyses help define the  
440 time-windows used by source localisation. Although some minor effects were shown  
441 in only one of these analyses, our most interesting effects are reliable in all three data  
442 types.

443 **Pre-DP analyses.** We assessed neural responses before the DP, during which  
444 only the shared speech segments have been heard and hence the words and  
445 pseudowords in each stimulus set are indistinguishable. Since there could not have  
446 been any effect of lexical status pre-DP, only prime type effects were considered in  
447 this analysis. Predictive- and competitive-selection accounts make opposite

448 predictions for pre-DP neural signals evoked by word-primed items compared to  
449 unprimed items. We therefore conducted an F-test for neural differences between  
450 these two conditions across the scalp and source spaces over a time period of -150  
451 to 0ms before the DP. A significant cluster of 295 sensor x time points ( $p = .023$ ) was  
452 found in gradiometers over the mid-left scalp locations from -28 to -4ms (Figure 5A),  
453 in which unprimed items evoked significantly greater neural responses than word-  
454 primed items. On the suggestion of a reviewer, and mindful of the potential for these  
455 pre-DP neural responses to be modulated by post-DP information, we report an  
456 additional analysis with a lengthened analysis time window of -150ms to 100ms. Again,  
457 we found a significant unprimed > word-primed cluster of 313 sensor x time points ( $p$   
458 = .033) over the exact same locations in gradiometers from -28 to -3ms pre-DP, which  
459 confirmed that this pre-DP effect was not pushed forward by any post-DP effect. We  
460 did not find any cluster showing stronger neural responses for word-primed items than  
461 unprimed items and no clusters survived correction for multiple comparisons for  
462 magnetometer responses or for analysis in source space.

463 To further examine these results, we also conducted ROI analysis of gradiometer  
464 signals evoked by unprimed and primed items averaged over the same -150 to 0ms  
465 pre-DP time window but across the scalp locations that showed the post-DP lexicality  
466 effect at which pseudowords elicited greater neural responses than words (see Figure  
467 6A). As shown in Figure 5B, the results indicated that unprimed items elicited  
468 significantly stronger neural responses than word-primed items,  $t(21) = 2.41$ ,  $p = .013$ ,  
469 consistent with the whole-brain analysis. In particular, the mid-left cluster shown in  
470 panel A partially overlaps with the post-DP pseudoword>word cluster. The direction  
471 and location of these pre-DP neural responses are in accordance with the predictive-  
472 selection account and inconsistent with the competitive-selection account. A surprising

473 finding is that post-hoc analysis also showed greater neural responses evoked by  
474 unprimed items than pseudoword-primed items,  $t(21) = 2.69$ ,  $p = .014$ , although we  
475 had not predicted these effects from pseudoword primes.

476 **Post-DP analyses.** We then examined the post-DP response differences  
477 between words and pseudowords (lexicality effect). The gradiometer sensors showed  
478 a significant cluster of 39335 sensor x time points ( $p < .001$ ) over the left side of the  
479 scalp at 313-956ms post-DP (Figure 6A). In this cluster, pseudowords evoked a  
480 significantly stronger neural response than words. Similarly, magnetometer sensors  
481 also detected a significant left-hemisphere cluster of 68517 sensor x time points ( $p$   
482  $< .001$ ) at 359-990ms post-DP (Figure 6B) showing the same lexicality effect. We did  
483 not find any significant cluster in which words evoked greater neural responses than  
484 pseudowords. These results are consistent with findings from Gagnepain and  
485 colleagues (2012). To locate the likely neural source of the effects found in sensor  
486 space, we conducted source reconstruction by integrating gradiometers and  
487 magnetometers. As shown in Figure 6C, results from source space showed that neural  
488 generators of the lexicality effect were estimated to lie within the left superior temporal  
489 gyrus (STG, volume of 2315 voxels,  $p < .001$ , peak at  $x = -46$ ,  $y = -36$ ,  $z = 0$ ;  $x = -52$ ,  
490  $y = -34$ ,  $z = -6$ ;  $x = -56$ ,  $y = -28$ ,  $z = -10$ ). This location, and direction of response, is  
491 consistent with a sub-lexical (e.g. phonemic) process being modulated by lexicality; in  
492 line with the predictive-selection account.

493 Next, we investigated whether the neural responses that were modulated by  
494 lexicality were also influenced by prime type by conducting an ROI analysis which  
495 tested the interaction between prime type and lexicality, as well as planned pairwise  
496 comparisons of priming effects on words alone, using data averaged over the time  
497 window and the sensor locations of the significant cluster shown in panel A and B

498 (Figure 6D & E). Since these planned pairwise comparisons involve responses to  
499 familiar words only (i.e. words that are word-primed vs unprimed, words that are word-  
500 primed vs pseudoword-primed), they are orthogonal to the lexicality effect that defined  
501 the pseudoword>word cluster and hence are not confounded by task. The interaction  
502 was significant in both gradiometers,  $F(1.96, 41.11) = 7.30, p = .002$ , and  
503 magnetometers,  $F(1.90, 39.99) = 5.80, p = .007$ . Specifically, there was a significant  
504 effect of prime type for words,  $F(1.93, 40.55) = 8.01, p = .001$  (gradiometers),  $F(1.81,$   
505  $37.96) = 5.61, p = .009$  (magnetometers), such that neural signals evoked by word-  
506 primed words were significantly stronger than those evoked by unprimed words,  $t(21)$   
507  $= 2.22, p = .019$  (gradiometers),  $t(21) = 3.33, p = .002$  (magnetometers), and  
508 pseudoword-primed words,  $t(21) = 3.70, p < .001$  (gradiometers),  $t(21) = 2.64, p = .008$   
509 (magnetometers). In contrast, there was no reliable main effect of prime type for  
510 pseudowords,  $F(1.94, 40.80) = 0.67, p = .514$  (gradiometers),  $F(1.79, 37.61) = 0.80, p$   
511  $= .446$  (magnetometers). The corresponding tests performed on the source-  
512 reconstructed power within the lexicality ROI of suprathreshold voxels (Figure 6F) did  
513 not show a reliable interaction effect between lexicality and competitor priming,  $F(1.56,$   
514  $32.85) = 0.99, p = .36$ . Nevertheless, consistent with sensor space results, source  
515 power did show a significant effect of prime type for words,  $F(1.73, 36.42) = 3.77, p$   
516  $= .038$ , but not pseudowords,  $F(1.62, 33.94) = 1.12, p = .326$ . Pairwise comparisons  
517 also indicated that word-primed words evoked significantly greater source strength  
518 than unprimed words,  $t(21) = 2.66, p = .007$ , though the effect between word-primed  
519 and pseudoword-primed words was not significant,  $t(21) = 1.26, p = .110$ . Overall, in  
520 line with behavioural results, neural responses evoked by words and pseudowords  
521 were also influenced differently by prime type. Critically, competitor priming modulated  
522 the post-DP neural responses evoked by words, but not those evoked by pseudowords,

523 and these effects were localised to the left STG regions that plausibly contribute to  
524 sub-lexical processing of speech. This matches the pattern of responses proposed in  
525 the predictive-selection model (see Figure 1F).

526 As encouraged by a reviewer, we also conducted whole brain analyses for the  
527 competitor priming effects. We found a significant word-primed word > unprimed word  
528 cluster of 1197 sensor x time points ( $p = .034$ ) in magnetometers in the left hemisphere  
529 within a time window of 426 - 466ms post-DP. We also found a significant and a  
530 marginal word-primed word > pseudoword-primed word cluster in gradiometers in the  
531 left hemisphere respectively of 527 sensor x time points ( $p = .011$ ) at 719-749ms and  
532 471 sensor x time points ( $p = .053$ ) at 315-336ms. These topographies and time  
533 courses overlap with the pseudoword > word clusters and are consistent with our ROI  
534 results. Hence, the ROI analyses have picked up the most important findings from  
535 these whole-brain analyses.

536 To ensure that other response patterns were not overlooked, we also  
537 investigated whether there was any lexicality by prime-type interaction at other  
538 locations across the scalp and source spaces, and during other time periods. As  
539 shown in Figure 7A, a significant cluster of Gradiometers at midline posterior scalp  
540 locations were found at 397-437ms post-DP, in which the effect of priming was  
541 significantly different for words and pseudowords. Figure 7B shows gradiometer  
542 signals evoked by conditions of interest averaged over the spatial and temporal extent  
543 of the significant cluster in panel A. To explore this profile, we computed an orthogonal  
544 contrast to assess the overall lexicality effect (the difference between words and  
545 pseudowords), and the result was marginal,  $F(1.00, 21.00) = 3.50, p = .075$ . The effect  
546 of prime type was marginally significant for words,  $F(1.89, 39.78) = 3.08, p = .060$ , but  
547 significant for pseudowords,  $F(1.80, 37.85) = 7.14, p = .003$ . The location and pattern

548 of this interaction cluster were dissimilar to those predicted by either competitive- or  
549 predictive-selection theories and no cluster survived correction in magnetometer  
550 sensors or source space hence we did not consider this effect to be as relevant or  
551 interpretable as our other findings. We report it here in the interest of completeness  
552 and transparency.

553 **Linking neural and behavioural effects.** To further examine the relationship  
554 between neural and behavioural response differences attributable to competitor  
555 priming or lexicality, we conducted a single-trial regression analyses using linear  
556 mixed-effect models that account for random intercepts and slopes for participants and  
557 stimuli sets (grouped by their initial segments). We calculated behavioural RT  
558 differences and neural MEG differences caused by: (1) lexicality. i.e. the difference  
559 between pseudoword and word trials (collapsed over primed and unprimed conditions)  
560 and (2) competitor priming, i.e. the difference between unprimed and word-primed  
561 word trials, with MEG signals averaged over the spatial and temporal extent of the  
562 post-DP pseudoword>word cluster seen in sensor space and the STG peak voxel in  
563 source space (see Figure 6). We then assessed the relationship between these  
564 behavioural and neural difference effects in linear mixed-effect regression of single  
565 trials, with differences in RTs as the independent variable and differences in MEG  
566 responses as the dependent variable. The analyses were conducted using the lme4  
567 package in R (Bates et al. 2014).

568 As shown in Figure 8A, we observed a significant positive relationship between  
569 RTs and magnetometers on lexicality difference ( $\beta = 0.11$ ,  $SE = 0.01$ ,  $t(23.31) = 7.77$ ,  
570  $p < .001$ ), although associations between RTs and gradiometers or source response  
571 were not significant. These observations from magnetometers indicated that slower  
572 lexical decision times evoked by pseudowords were associated with greater neural



573 responses. Furthermore, the intercept parameter for the magnetometers model was  
574 significantly larger than zero,  $\beta = 37.58$ ,  $SE = 5.72$ ,  $t(23.09) = 6.57$ ,  $p < .001$ . We can  
575 interpret this intercept as the neural difference that would be predicted for trials in  
576 which there was no delayed response to pseudowords compared to words. The  
577 significant intercept indicated a baseline difference in neural responses to words and  
578 pseudowords, even in the absence of any difference in processing effort (as indexed  
579 by lexical decision RTs). This suggested the engagement of additional neural  
580 processes specific to pseudowords regardless of the behavioural effect (cf. Taylor et  
581 al., 2014).

582 Figure 8B showed another significant positive relationship between RTs and  
583 magnetometers on competitor priming difference ( $\beta = 0.15$ ,  $SE = 0.02$ ,  $t(38.85) = 7.89$ ,  
584  $p < .001$ ), while relationships between RTs and gradiometers or source response were  
585 again not significant. Interestingly, unlike for the lexicality effect, the intercept in this  
586 competitor priming magnetometers model did not reach significance ( $\beta = 12.88$ ,  $SE =$   
587  $7.27$ ,  $t(21.33) = 1.77$ ,  $p = .091$ ). This non-significant intercept might suggest that if  
588 word-primed words did not evoke longer RTs than unprimed words, magnetometer  
589 signals would not be reliably different between the two conditions either. Hence,  
590 consistent with predictive-selection accounts, the increased post-DP neural responses  
591 in the STG caused by competitor priming was both positively linked to and mediated  
592 by longer response times.

593

594

## 595 **Discussion (1487)**

596 In this study, we distinguished different implementations of Bayesian perceptual  
597 inference by manipulating the prior probability of spoken words and examining the



598 pattern of neural responses. We replicated the competitor priming effect such that a  
599 single prior presentation of a competitor word (e.g. *hijack*) delayed the recognition of  
600 a similar-sounding word (e.g. *hygiene*), whereas this effect was not observed when  
601 the prime or target was a pseudoword (e.g. *hijure*). Armed with this behavioural  
602 evidence, we used MEG data to test the neural bases of two Bayesian theories of  
603 spoken word recognition.

604

### 605 **Competitive- vs predictive-selection**

606 Competitive-selection accounts propose that word recognition is achieved through  
607 direct inhibitory connections between representations of similar candidates (e.g.  
608 McClelland & Elman, 1986). Priming boosts the activation of heard words and  
609 increases lateral inhibition applied to neighbouring words, which delays their  
610 subsequent identification. The effect of competitor priming is to increase lexical  
611 uncertainty, and hence lexical-level neural responses, until later time points when  
612 target words can be distinguished from the competitor prime (Figure 1C). In contrast,  
613 predictive-selection accounts propose that word recognition is achieved by subtracting  
614 predicted speech from heard speech and using computations of prediction error to  
615 update lexical probabilities (Davis & Sohoglu, 2020). By this view, predictions for  
616 segments that are shared between competitor primes and targets (pre-DP segments)  
617 will be enhanced after presentation of prime words. Thus, competitor priming will  
618 reduce the magnitude of prediction error, and hence neural responses pre-DP (Figure  
619 1F). Only when speech diverges from predictions (post-DP segments) will competitor-  
620 primed words evoke greater prediction error, leading to increased neural response in

621 brain areas involved in pre-lexical (e.g. phonemic) processing of speech representing  
622 prediction error (Blank et al., 2018; Blank & Davis, 2016).

623 It should be acknowledged that both models involve multiple levels of  
624 representation and hence both sub-lexical and lexical processes. However, our focus  
625 is on lexical processing within the competitive-selection framework and sub-lexical  
626 processing within the predictive-selection framework. These are the critical levels that  
627 1) support word recognition according to each theory, 2) are modulated by the  
628 competitor priming effect that our study manipulates and 3) are invoked to explain the  
629 slower behavioural responses and associated changes in MEG responses that we  
630 observed.

631 We tested the predictions for the direction and timing of neural responses  
632 associated with competitor priming using MEG data which showed opposite neural  
633 effects pre- and post-DP. In the pre-DP period, consistent with predictive-selection but  
634 contrary to competitive-selection mechanism, we saw decreased neural responses for  
635 word-primed items compared to unprimed items. The initial, shared segments between  
636 prime (*hijack*) and target (*hygiene*) words evoked a reduced response during early  
637 time periods in line with a reduction in prediction error. However, during the post-DP  
638 period, we found competitor-primed words evoked stronger neural responses than  
639 unprimed words in exactly the same locations and time periods that showed increased  
640 responses to pseudowords (*hijure*) compared to words. These post-DP response  
641 increases are in line with enhanced processing difficulty for competitor-primed words  
642 and pseudowords due to greater prediction error. Thus, the time course of the  
643 competitor priming neural effects – showing reduced neural responses pre-DP and  
644 increased neural responses post-DP – closely resembles the expected changes in  
645 prediction error (Figure 1F) based on predictive-selection mechanisms.

646 On top of the direction and timing of neural responses, effects of lexicality and  
647 competitor priming localised to the left STG. This is a brain region that has long been  
648 associated with lower-level sensory processing of speech (Yi et al., 2019). Our  
649 observation of increased responses to pseudowords in this region is in accordance  
650 with source-localised MEG findings (Gagnepain et al., 2012; Shtyrov et al., 2012) and  
651 evidence from a meta-analysis of PET and fMRI studies (Davis & Gaskell, 2009). This  
652 location is also consistent with the proposal that lexical influences on segment-level  
653 computations produce reliable neural differences between words and pseudowords  
654 (Davis & Sohoglu, 2020). We take this finding as further evidence in favour of  
655 computations of segment prediction error as a critical mechanism underlying word  
656 identification.

657 We further show using regression analyses that neural (MEG) and behavioural  
658 (RT) effects of lexicality and competitor priming are linked on a trial-by-trial basis.  
659 Trials in which pseudoword processing or competitor priming leads to larger increases  
660 in RT also have greater post-DP neural responses. These links between behavioural  
661 and neural effects of lexicality and competitor priming are once more in-line with the  
662 proposal that post-DP increases in prediction error are a key neural mechanism for  
663 word and pseudoword processing and can explain the delayed behavioural responses  
664 seen in competitor priming. Interestingly, lexicality and competitor priming effects differ  
665 in terms of whether a reliable neural response difference would be seen for trials with  
666 no baseline RT difference. While neural lexicality effects were significant even for trials  
667 that did not show behavioural effects, the same was not true for the competitor priming  
668 effect. These results indicate that, consistent with predictive-selection accounts, the  
669 post-DP neural competitor priming effect was mediated by changes in behavioural RTs.  
670 In contrast, an increased neural response to pseudowords was expected even in trials

671 for which RTs did not differ between pseudowords and words. We will consider the  
672 implications of these and other findings for pseudoword processing in the next section.

673

#### 674 **How do listeners process pseudowords?**

675 Participants identified pseudowords with a speed and accuracy similar to that seen  
676 during recognition of familiar words. This is consistent with an optimally-efficient  
677 language processing system (Marslen-Wilson, 1984; Zhuang et al, 2014), in which  
678 pseudowords can be distinguished from real words as soon as deviating speech  
679 segments are heard. Beyond this well-established behavioural finding, however, we  
680 reported two seemingly contradictory observations concerning pseudoword  
681 processing.

682 The first is that, while post-DP neural activity and response times for words were  
683 modulated by competitor priming, processing of pseudowords was not similarly  
684 affected. This might suggest that the prior probability of hearing a pseudoword and the  
685 prediction error elicited by mismatching segments are not changed by our  
686 experimental manipulations. This may be because pseudowords have a low or zero  
687 prior probability and elicit maximal prediction errors that cannot be modified by a single  
688 prime. Yet, memory studies suggest that even a single presentation of a pseudoword  
689 can be sufficient for listeners to establish a lasting memory trace (Mckone & Trynes,  
690 1999; Arndt et al., 2008). However, it is possible that this memory for pseudowords  
691 reflects a different type of memory (e.g. episodic memory) from that produced by a  
692 word, with only the latter able to temporarily modify long-term, lexical-level  
693 representations and predictions for word speech segments (cf. Complementary  
694 Learning Systems theories, McClelland et al., 1995; Davis & Gaskell, 2009).

695 A second observation is that, contrary to the null result for post-DP processing,  
696 pseudoword priming reduced subsequent pre-DP neural responses evoked by target  
697 items to a similar degree as word priming (Figure 5B). This pre-DP effect is surprising  
698 given previous evidence suggesting that pseudowords must be encoded into memory  
699 and subject to overnight, sleep-associated consolidation in order to modulate the  
700 speed of lexical processing (Tamminen et al., 2010; James et al., 2017) or neural  
701 responses (Davis & Gaskell, 2009; Landi et al. 2018). It might be that neural effects  
702 seen for these pre-DP segments were due to changes to the representation of familiar  
703 words that our pseudowords resembled, though these were insufficient to modulate  
704 processing of post-DP segments.

705

## 706 **Summary**

707 Our work provides compelling evidence in favour of neural computations of prediction  
708 error during spoken word recognition. Although the previous work by Gagnepain et al.  
709 (2012) also provided evidence for the predictive-selection account, their behavioural  
710 effects of consolidation on word recognition were obtained during different tasks and  
711 different sessions from their neural responses. Our current study goes beyond this  
712 previous work by adopting a single task (lexical decision) and using a competitor  
713 priming paradigm that permits concurrent measurement of perceptual outcomes and  
714 neural responses in a single session. This enables us to directly link trials that evoked  
715 stronger neural signals in the STG to delayed RTs and hence provide stronger  
716 evidence that both of these effects are caused by competitor priming.

717 In addition, unlike previous work (Brodbeck et al. 2018; Donhauser & Baillet,  
718 2020) which reported neural responses correlated with lexical entropy as well as

719 prediction error (surprisal), we did not find any similarly equivocal evidence. These  
720 earlier studies measured neural responses to familiar words in continuous speech  
721 sequences such as stories or talks. It might be that effects of lexical entropy are more  
722 apparent for connected speech than isolated words. However, since lexical uncertainty  
723 (entropy) and segment-level predictability (segment prediction error or surprisal) are  
724 highly correlated in natural continuous speech, these studies may be less able to  
725 distinguish between the lexical and segmental mechanisms that we assessed here. In  
726 contrast, our speech materials were carefully selected to change lexical probability  
727 (through priming) and for priming to have opposite effects on segment prediction error  
728 before and after DP. This manipulation provides evidence in favour of predictive-  
729 selection mechanisms that operate using computations of prediction error during  
730 spoken word recognition.

731 **References**

- 732 Aitchison, L., & Lengyel, M. (2017). With or without you: predictive coding and  
733 Bayesian inference in the brain. *Current opinion in neurobiology*, 46, 219-227.
- 734 Arndt, J., Lee, K., & Flora, D. B. (2008). Recognition without identification for words,  
735 pseudowords and nonwords. *Journal of memory and language*, 59(3), 346-  
736 360.
- 737 Baayen, R. H., Piepenbrock, R., & van H, R. (1993). The {CELEX} lexical data base  
738 on {CD-ROM}.
- 739 Barr, D. J., Levy, R., Scheepers, C., & Tily, H. J. (2013). Random effects structure  
740 for confirmatory hypothesis testing: Keep it maximal. *Journal of memory and*  
741 *language*, 68(3), 255-278.
- 742 Bates, D., Mächler, M., Bolker, B., & Walker, S. (2014). Fitting linear mixed-effects  
743 models using lme4. *arXiv preprint arXiv:1406.5823*.
- 744 Blank, H., Spangenberg, M., & Davis, M. H. (2018). Neural prediction errors  
745 distinguish perception and misperception of speech. *Journal of*  
746 *Neuroscience*, 38(27), 6076-6089.
- 747 Blank, H., & Davis, M. H. (2016). Prediction errors but not sharpened signals  
748 simulate multivoxel fMRI patterns during speech perception. *PLoS*  
749 *biology*, 14(11), e1002577.
- 750 Bozic, M., Tyler, L. K., Ives, D. T., Randall, B., & Marslen-Wilson, W. D. (2010).  
751 Bihemispheric foundations for human speech comprehension. *Proceedings of*  
752 *the National Academy of Sciences*, 107(40), 17439-17444.
- 753 Brodbeck, C., Hong, L. E., & Simon, J. Z. (2018). Rapid transformation from auditory  
754 to linguistic representations of continuous speech. *Current Biology*, 28(24),  
755 3976-3983.

- 756 Brysbaert, M., Stevens, M., Mandera, P., & Keuleers, E. (2016). How many words do  
757 we know? Practical estimates of vocabulary size dependent on word definition,  
758 the degree of language input and the participant's age. *Frontiers in*  
759 *Psychology*, 7(JUL), 1–11.
- 760 Bürkner, P. C. (2017). brms: An R package for Bayesian multilevel models using  
761 Stan. *Journal of statistical software*, 80(1), 1-28.
- 762 Cousineau, D. (2005). Confidence intervals in within-participant designs: A simpler  
763 solution to Loftus and Masson's method. *Tutorials in quantitative methods for*  
764 *psychology*, 1(1), 42-45.
- 765 Dahan, D., Magnuson, J. S., & Tanenhaus, M. K. (2001). Time course of frequency  
766 effects in spoken-word recognition: Evidence from eye movements. *Cognitive*  
767 *psychology*, 42(4), 317-367.
- 768 Davis, M.H. (2015). The Neurobiology of Lexical Access. In G. Hickok & S. L. Small  
769 (Eds.), *Neurobiology of language* (pp. 541-555). Academic Press.
- 770 Davis, M. H., & Gaskell, M. G. (2009). A complementary systems account of word  
771 learning: neural and behavioural evidence. *Philosophical Transactions of the*  
772 *Royal Society B: Biological Sciences*, 364(1536), 3773-3800.
- 773 Davis, M. H., Marslen-Wilson, W. D., & Gaskell, M. G. (2002). Leading up the lexical  
774 garden path: Segmentation and ambiguity in spoken word recognition. *Journal*  
775 *of Experimental Psychology: Human Perception and Performance*, 28(1), 218.
- 776 Davis, M.H., Scharenborg, O. (2016) Speech perception by humans and machines.  
777 In Gaskell, G. & Mirkovic J. (Eds) *Speech Perception and Spoken Word*  
778 *Recognition*. Psychology Press.



- 779 Davis, M. H. & Sohoglu E. (2020) Three Functions of Prediction Error for Bayesian  
780 Inference in Speech Perception. In: Gazzaniga, M., Mangun R., & Poeppel D.  
781 (Eds), *The Cognitive Neurosciences*, 6th Edition. MIT Press, Camb, MA, USA.
- 782 de Leeuw, J. R. (2015). jsPsych: A JavaScript library for creating behavioral  
783 experiments in a web browser. *Behavior Research Methods*, 47(1), 1-12.  
784 doi:10.3758/s13428-014-0458-y.
- 785 Donhauser, P. W., & Baillet, S. (2020). Two Distinct Neural Timescales for Predictive  
786 Speech Processing. *Neuron*.
- 787 Eberhard, K. M. (1994). Phonological inhibition in auditory word recognition. In D.  
788 Dagenbach & T. H. Carr (Eds.), *Inhibitory processes in attention memory and*  
789 *language*. San Diego, CA: Academic Press.
- 790 Gagnepain, P., Henson, R. N., & Davis, M. H. (2012). Temporal predictive codes for  
791 spoken words in auditory cortex. *Current Biology*, 22(7), 615-621.
- 792 Gwilliams, L. & Davis, M. (in press). Extracting language content from speech  
793 sounds: An information theoretic approach. *The Auditory Cognitive*  
794 *Neuroscience of Speech Perception*. [\(hal-03013496\)](#)
- 795 Henson, R.N., Wakeman, D.G., Litvak, V. & Friston, K.J. (2011). A Parametric  
796 Empirical Bayesian framework for the EEG/MEG inverse problem: generative  
797 models for multiparticipant and multimodal integration. *Frontiers in Human*  
798 *Neuroscience*, 5, 76, 1-16.
- 799 James, E., Gaskell, M. G., Weighall, A., & Henderson, L. (2017). Consolidation of  
800 vocabulary during sleep: The rich get richer?. *Neuroscience & Biobehavioral*  
801 *Reviews*, 77, 1-13.

- 802 Kawahara, H. (2006). STRAIGHT, exploitation of the other aspect of VOCODER:  
803 Perceptually isomorphic decomposition of speech sounds. *Acoustical science*  
804 *and technology*, 27(6), 349-353.
- 805 Kilner, J. M., & Friston, K. J. (2010). Topological inference for EEG and MEG. *The*  
806 *Annals of Applied Statistics*, 1272-1290.
- 807 Kisler, T. and Reichel U. D. and Schiel, F. (2017): Multilingual processing of speech  
808 via web services, *Computer Speech & Language*, Volume 45, September  
809 2017, pages 326–347.
- 810 Kleiner, M., Brainard, D., & Pelli, D. (2007). What's new in Psychtoolbox-3?.
- 811 Landi, N., Malins, J. G., Frost, S. J., Magnuson, J. S., Molfese, P., Ryherd, K., ... &  
812 Pugh, K. R. (2018). Neural representations for newly learned words are  
813 modulated by overnight consolidation, reading skill, and  
814 age. *Neuropsychologia*, 111, 133-144.
- 815 Litvak, V., Mattout, J., Kiebel, S., Phillips, C., Henson, R., Kilner, J., ... & Penny, W.  
816 (2011). EEG and MEG data analysis in SPM8. *Computational intelligence and*  
817 *neuroscience*, 2011.
- 818 Mandera, P., Keuleers, E., & Brysbaert, M. (2017). Explaining human performance in  
819 psycholinguistic tasks with models of semantic similarity based on prediction  
820 and counting: A review and empirical validation. *Journal of Memory and*  
821 *Language*, 92, 57-78.
- 822 Marslen-Wilson WD. 1984. Function and process in spoken word recognition. In:  
823 Bouma H, Bouwhuis DG, editors. Attention and performance X: control of  
824 language processes. Hillsdale (NJ): Erlbaum. p. 125–150.
- 825 Marsolek, C. J. (2008). What antipriming reveals about priming. *Trends in Cognitive*  
826 *Sciences*, 12(5), 176-181.

- 827 Mattout, J., Henson, R. N., and Friston, K. J. (2007). Canonical source  
828 reconstruction for MEG. *Comp. Int. Neurosci.* 2007, 67613.
- 829 McClelland, J. L., & Elman, J. L. (1986). The TRACE model of speech  
830 perception. *Cognitive psychology*, 18(1), 1-86.
- 831 McClelland, J. L., McNaughton, B. L., & O'Reilly, R. C. (1995). Why there are  
832 complementary learning systems in the hippocampus and neocortex: Insights  
833 from the successes and failures of connectionist models of learning and  
834 memory. *Psychological Review*, 102, 419–457.
- 835 Mckone, E., & Trynes, K. (1999). Acquisition of novel traces in short-term implicit  
836 memory: Priming for nonwords and new associations. *Memory &*  
837 *cognition*, 27(4), 619-632.
- 838 Monsell, S., & Hirsh, K. W. (1998). Competitor priming in spoken word  
839 recognition. *Journal of Experimental Psychology: Learning, Memory, and*  
840 *Cognition*, 24(6), 1495.
- 841 Norris, D., & McQueen, J. M. (2008). Shortlist B: a Bayesian model of continuous  
842 speech recognition. *Psychological review*, 115(2), 357.
- 843 Norris, D., McQueen, J. M., & Cutler, A. (2000). Merging information in speech  
844 recognition: Feedback is never necessary. *Behavioral and Brain*  
845 *Sciences*, 23(3), 299-325.
- 846 Norris, D., McQueen, J. M., & Cutler, A. (2002). Bias effects in facilitatory  
847 phonological priming. *Memory & Cognition*, 30(3), 399-411.
- 848 Okada, K., & Hickok, G. (2006). Identification of lexical–phonological networks in the  
849 superior temporal sulcus using functional magnetic resonance  
850 imaging. *Neuroreport*, 17(12), 1293-1296.

- 851 Prabhakaran, R., Blumstein, S. E., Myers, E. B., Hutchison, E., & Britton, B. (2006).  
852 An event-related fMRI investigation of phonological–lexical  
853 competition. *Neuropsychologia*, *44*(12), 2209-2221.
- 854 Schiel, F. (1999). Automatic Phonetic Transcription of Non-Prompted Speech. In  
855 Proc. of the ICPHS (pp. 607-610).
- 856 Shtyrov, Y., Smith, M. L., Horner, A. J., Henson, R., Nathan, P. J., Bullmore, E. T., &  
857 Pulvermüller, F. (2012). Attention to language: novel MEG paradigm for  
858 registering involuntary language processing in the  
859 brain. *Neuropsychologia*, *50*(11), 2605-2616.
- 860 Sohoglu, E., & Davis, M. H. (2016). Perceptual learning of degraded speech by  
861 minimizing prediction error. *Proceedings of the National Academy of*  
862 *Sciences*, *113*(12), E1747-E1756.
- 863 Sohoglu, E., Peelle, J. E., Carlyon, R. P., & Davis, M. H. (2012). Predictive top-down  
864 integration of prior knowledge during speech perception. *Journal of*  
865 *Neuroscience*, *32*(25), 8443-8453.
- 866 Spratling, M. W. (2008). Reconciling predictive coding and biased competition  
867 models of cortical function. *Frontiers in computational neuroscience*, *2*, 4.
- 868 Tamminen, J., Payne, J. D., Stickgold, R., Wamsley, E. J., & Gaskell, M. G. (2010).  
869 Sleep spindle activity is associated with the integration of new memories and  
870 existing knowledge. *Journal of Neuroscience*, *30*(43), 14356-14360.
- 871 Tauroza, S., & Allison, D. (1990). Speech rates in british english. *Applied*  
872 *linguistics*, *11*(1), 90-105.
- 873 van Casteren, M., & Davis, M. H. (2006). Mix, a program for  
874 pseudorandomization. *Behavior research methods*, *38*(4), 584-589.

- 875 Taylor, J. S. H., Rastle, K., & Davis, M. H. (2013). Can cognitive models explain  
876 brain activation during word and pseudoword reading? A meta-analysis of 36  
877 neuroimaging studies. *Psychological bulletin*, 139(4), 766.
- 878 Taylor, J. S. H., Rastle, K., & Davis, M. H. (2014). Interpreting response time effects  
879 in functional imaging studies. *Neuroimage*, 99, 419-433.
- 880 van Heuven, W. J., Mandera, P., Keuleers, E., & Brysbaert, M. (2014). SUBTLEX-  
881 UK: A new and improved word frequency database for British  
882 English. *Quarterly Journal of Experimental Psychology*, 67(6), 1176-1190.
- 883 Wagenmakers, E. J., Lodewyckx, T., Kuriyal, H., & Grasman, R. (2010). Bayesian  
884 hypothesis testing for psychologists: A tutorial on the Savage–Dickey  
885 method. *Cognitive psychology*, 60(3), 158-189.
- 886 Yi, H. G., Leonard, M. K., & Chang, E. F. (2019). The encoding of speech sounds in  
887 the superior temporal gyrus. *Neuron*, 102(6), 1096-1110.
- 888 Ylinen, S., Bosseler, A., Junttila, K., & Huotilainen, M. (2017). Predictive coding  
889 accelerates word recognition and learning in the early stages of language  
890 development. *Developmental science*, 20(6), e12472.
- 891 Zhuang, J., Randall, B., Stamatakis, E. A., Marslen-Wilson, W. D., & Tyler, L. K.  
892 (2011). The interaction of lexical semantics and cohort competition in spoken  
893 word recognition: an fMRI study. *Journal of Cognitive Neuroscience*, 23(12),  
894 3778-3790.
- 895 Zhuang, J., Tyler, L. K., Randall, B., Stamatakis, E. A., & Marslen-Wilson, W. D.  
896 (2014). Optimally efficient neural systems for processing spoken  
897 language. *Cerebral Cortex*, 24(4), 908-918.
- 898
- 899

900 **Figures**

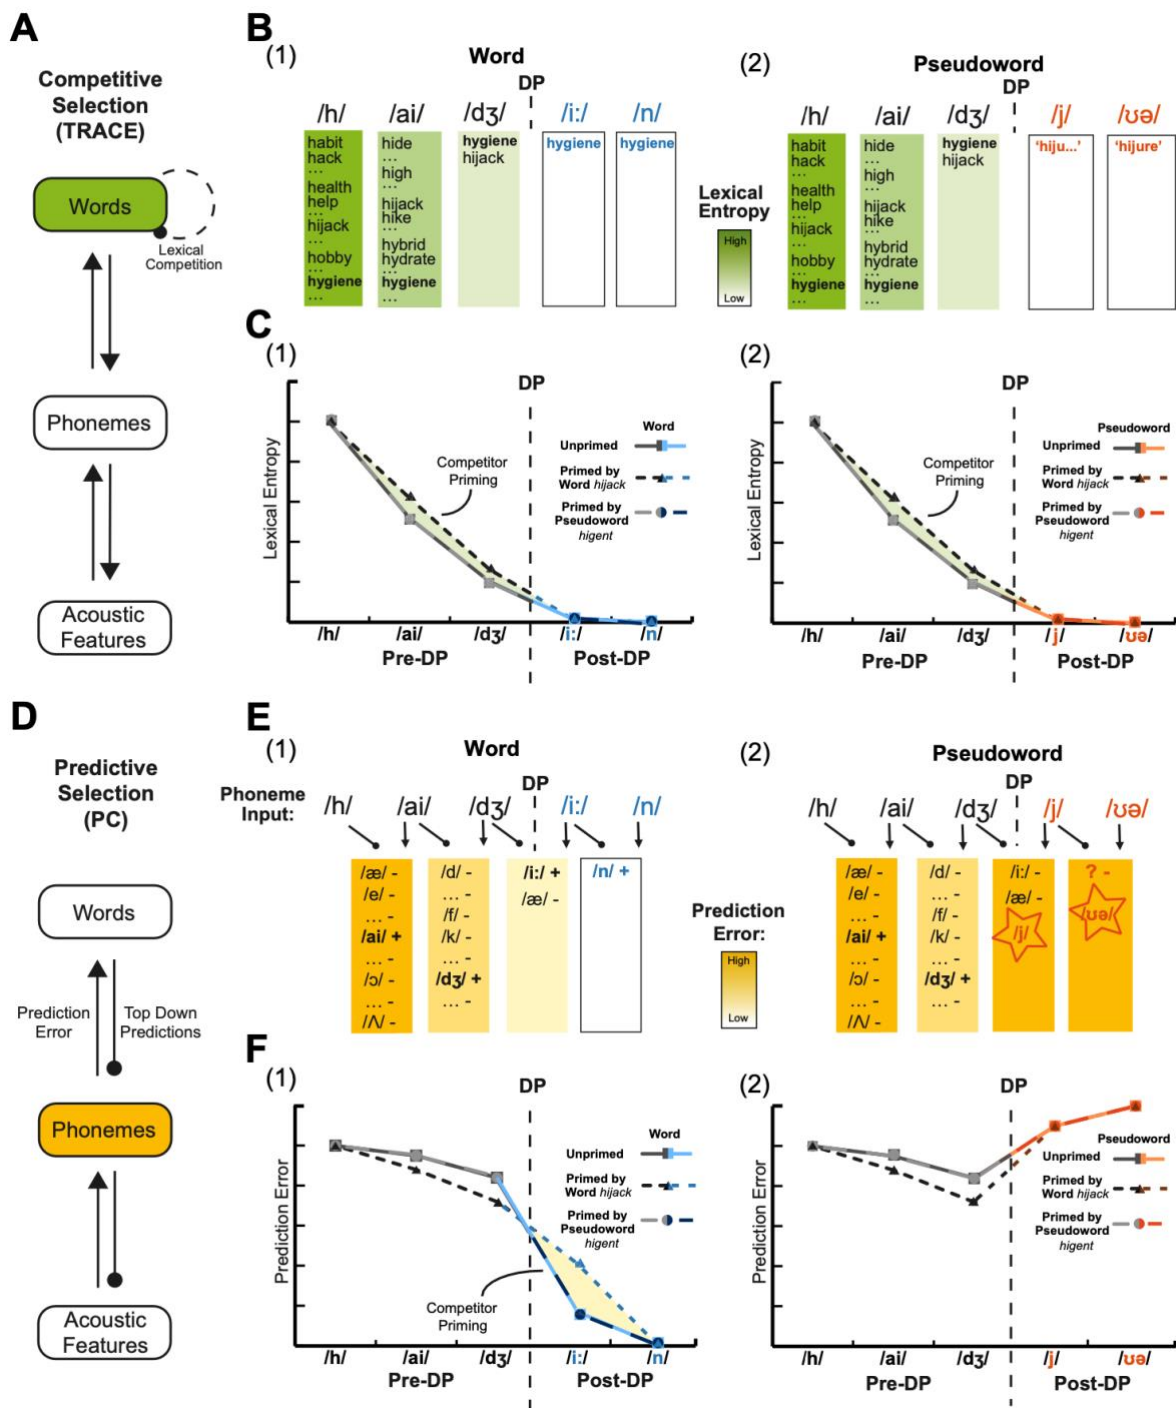

901

902 **Figure 1.** Illustration of neural predictions based on competitive-selection and  
 903 predictive-selection models respectively for recognition of a word (*hygiene*) or  
 904 pseudoword (*hijure*) that is unprimed or primed by a similar-sounding word (*hijack*) or  
 905 pseudoword (*higent*). **A.** In a competitive-selection model, such as TRACE  
 906 (McClelland & Elman, 1986), word recognition is achieved through within-layer lexical

907 competition. **B.** Illustration of the competitive-selection procedure for word (e.g.  
908 *hygiene*) and pseudoword (e.g. *hijure*) recognition. Phoneme input triggers the  
909 activation of multiple words beginning with the same segments, which compete with  
910 each other until one word is selected. No word can be selected when hearing a  
911 pseudoword, though it would be expected that lexical probability (although not lexical  
912 entropy) should be greater for words than for pseudowords. **C.** Illustration of neural  
913 predictions based on lexical entropy. Lexical entropy gradually reduces to zero as  
914 more speech is heard. Before the deviation point (hereafter DP) at which the prime  
915 (*hijack*) and target (*hygiene*) diverge, these items are indistinguishable, and competitor  
916 priming should transiently increase lexical entropy (shaded area). After the DP,  
917 competitor priming should not affect entropy since prime and target words can be  
918 distinguished. **D.** In a predictive-selection model such as the Predictive-Coding  
919 account (PC, Davis & Sohoglu, 2020), words are recognised by minimising prediction  
920 error, which is calculated by subtracting the predicted segments from the current  
921 sensory input. **E.** Illustration of the predictive-selection procedure during word (e.g.  
922 *hygiene*) and pseudoword (e.g. *hijure*) recognition. Speech input evokes predictions  
923 for the next segment (based on word knowledge as in B), which is then subtracted  
924 from the speech input and used to generate prediction errors that update lexical  
925 predictions (+ shows confirmed predictions that increase lexical probability, - shows  
926 disconfirmed predictions that decrease lexical probability). **F.** Illustration of neural  
927 predictions based on segment prediction error. Before the DP, priming of initial word  
928 segments should strengthen predictions and reduce prediction error. There will also  
929 be greater mismatch between predictions and heard speech for competitor-primed  
930 words and hence primed words should evoke greater prediction error than unprimed  
931 words (shaded area). This increased prediction error should still be less than that



932 observed for pseudowords, which should evoke maximal prediction error regardless  
933 of competitor priming due to their post-DP segments being entirely unpredictable.  
934



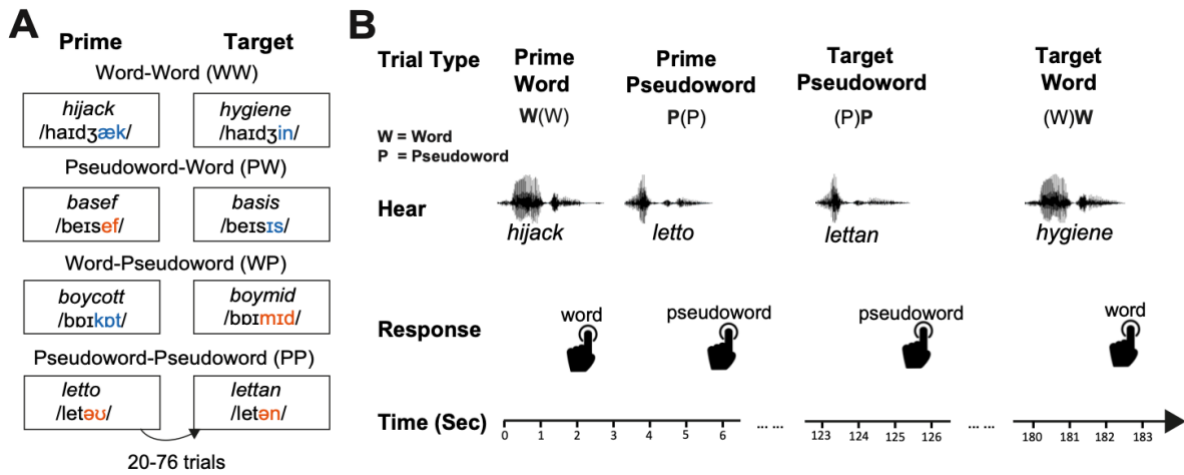

935

936 **Figure 2.** Experimental design. **A.** Four different types of prime-target pairs. Each pair  
 937 was formed by two stimuli from the same quadruplet, separated by between 20 to 76  
 938 trials of items that do not share the same initial segments. **B.** Lexical decision task.  
 939 Participants made lexicality judgments to each item they heard via left hand button-  
 940 press. The response time was recorded from the onset of the stimuli. As shown, items  
 941 within each quadruplet are repeated after a delay of ~1-4 minutes following a number  
 942 of other intervening stimuli.

943

944

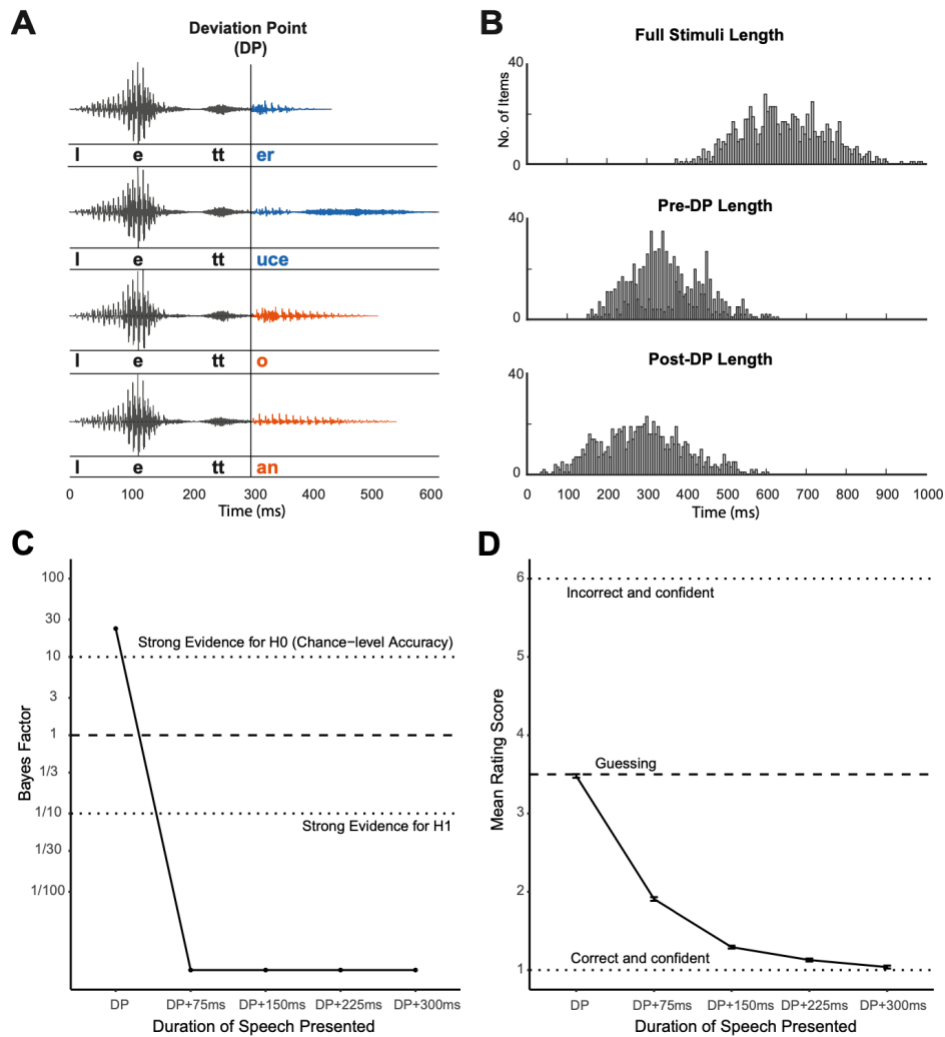

945

946 **Figure 3.** Stimuli and post-test gating study results. **A.** Stimuli within the same  
 947 quadruplet have identical onsets in STRAIGHT parameter space (Kawahara, 2006)  
 948 and thus only diverge from each other after the deviation point (DP). MEG responses  
 949 were time-locked to the DP. **B.** Stimuli length histogram. **C.** Bayes factor for chance  
 950 level accuracy (BF01) at each post-DP alignment point of the stimuli in the post-test  
 951 gating study. **D.** Mean rating score at each post-DP alignment point of the stimuli in  
 952 the gating study.

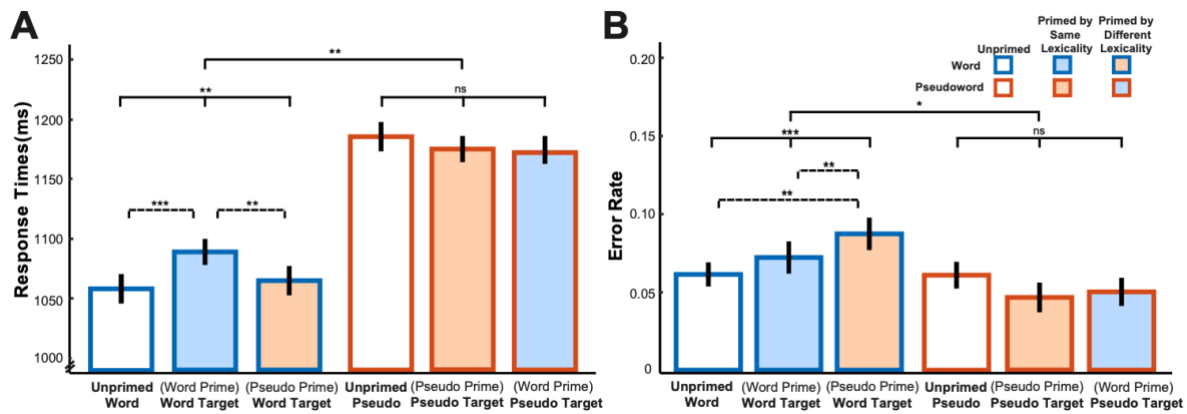

953

954 **Figure 4.** Response time results (**A**) and accuracy results (**B**) of the lexical decision

955 task. Bars are color-coded by lexicality and prime type on the x axis (words, blue frame;

956 pseudowords, orange frame; unprimed, no fill; primed by same lexicality, consistent

957 fill and frame colors; primed by different lexicality, inconsistent fill and frame colors).

958 Bars show the subject grand averages, error bars represent  $\pm$  within-subject SE,

959 adjusted to remove between-subjects variance (Cousineau, 2005). Statistical

960 significance is shown based on generalised linear mixed-effects regression: \*  $p < 0.05$ ,

961 \*\*  $p < 0.01$ , \*\*\*  $p < 0.001$ . Statistical comparisons shown with solid lines indicate the

962 lexicality by prime-type interaction and main effects of prime-type for each lexicality,

963 whereas comparisons with broken lines indicate the significance of pairwise

964 comparisons.

965

966

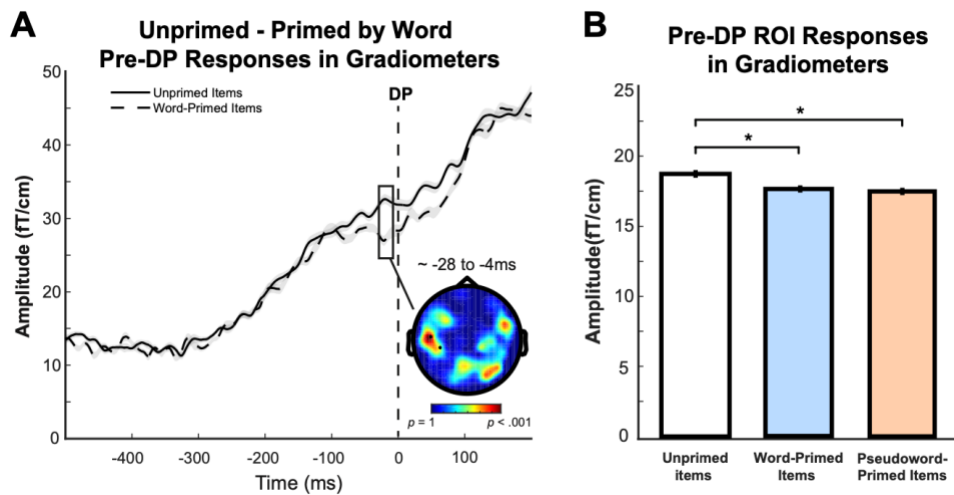

967

968 **Figure 5.** Pre-DP results. **A & B.** Pre-DP response difference between items that are

969 unprimed and primed by a word in MEG gradiometer sensors within -150 to 0ms (a

970 time window at which words and pseudowords are indistinguishable). The topographic

971 plots show F-statistics for the entire sensor array with the scalp locations that form two

972 statistically significant clusters highlighted and marked with black dots. Waveforms

973 represent MEG response averaged over the spatial extent of the significant cluster

974 shown in the topography. The grey shade of waveforms represents  $\pm$  within-participant

975 SE, adjusted to remove between-participants variance (Cousineau, 2005). **C.** ROI

976 analysis of neural responses evoked by unprimed and primed items averaged over

977 the same pre-DP time period of -150-0ms but across gradiometer sensor locations

978 which showed the post-DP pseudoword>word lexicality effect (see Figure 5A). Bars

979 are color-coded by prime type on the x axis (unprimed items, no fill; word-primed items,

980 blue; pseudoword-primed items, orange; black frame indicates that words and

981 pseudowords are indistinguishable). All error bars represent  $\pm$  within-participant SE,

982 adjusted to remove between-participant variance. Statistical significance: \*  $p < 0.05$ .

983

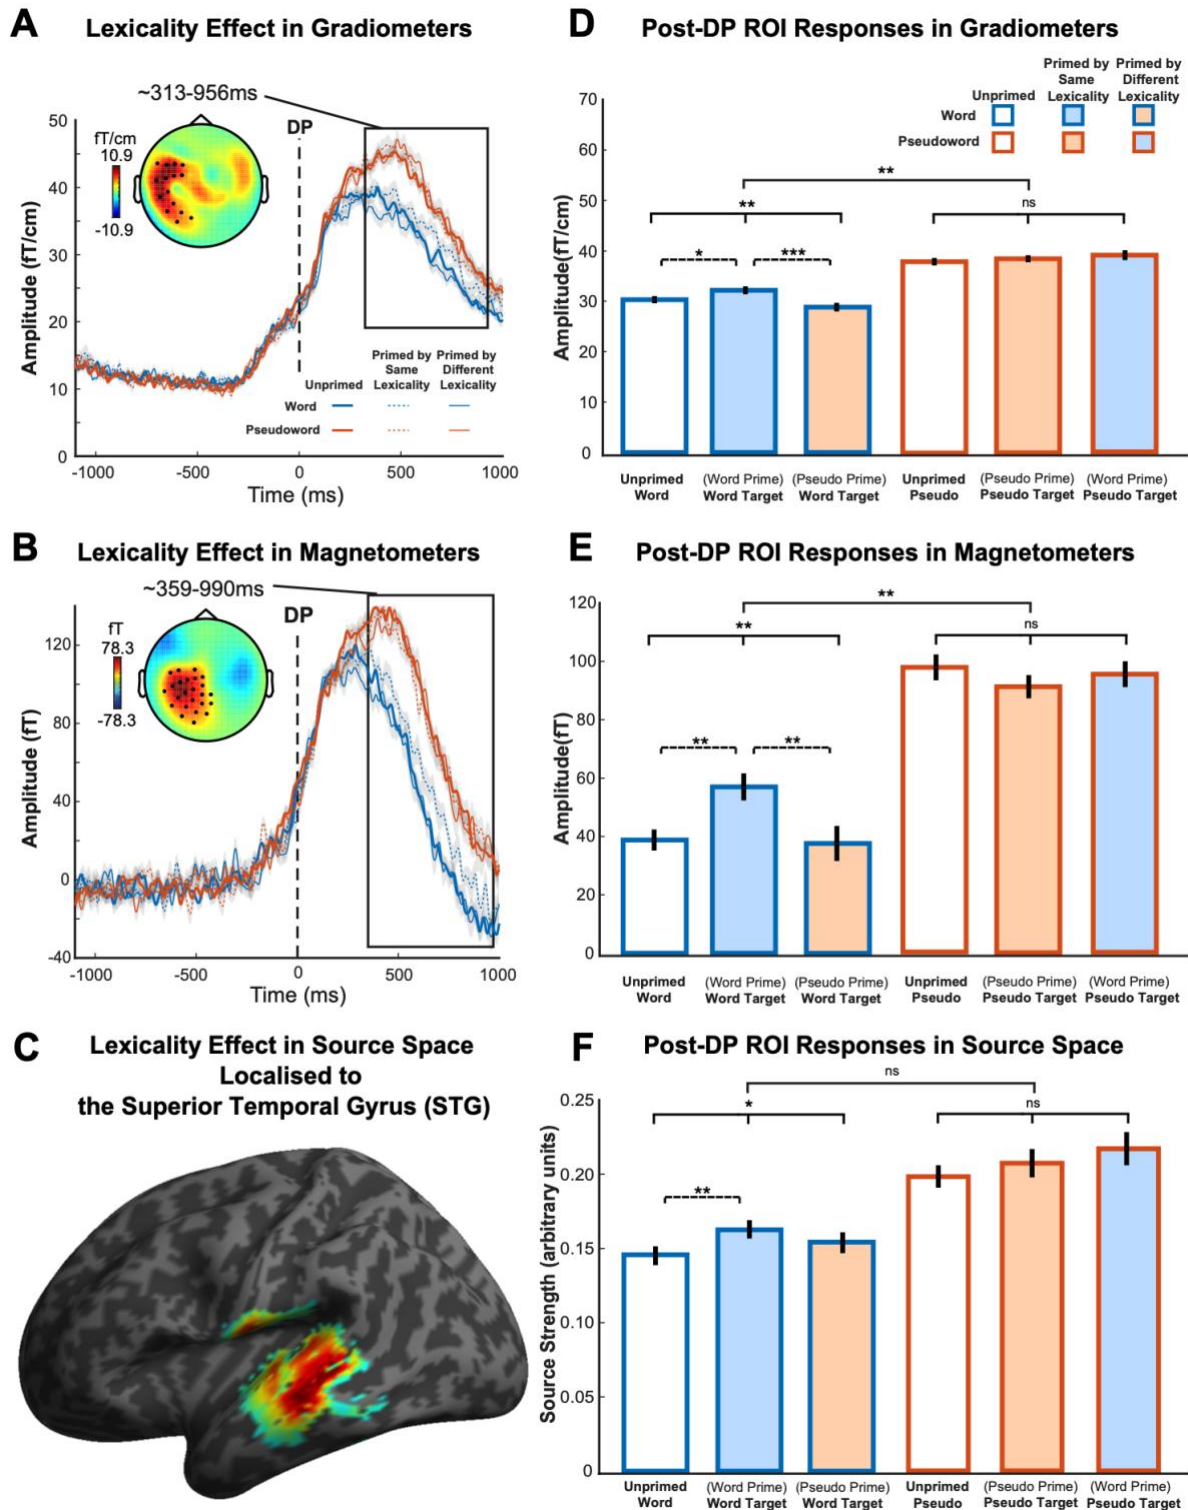

984

985 **Figure 6.** Post-DP results showing lexicality effects and corresponding ROI responses

986 evoked by conditions of interest. **A & B.** Post-DP lexicality effects in MEG gradiometer

987 and magnetometer sensors. The topographic plots show the statistically significant

988 cluster with a main effect of lexicality (pseudoword > word). Waveforms represent

989 MEG response averaged over the spatial extent of the significant cluster shown in the  
990 topography. The grey shade of waveforms represents  $\pm$  within-participant SE, adjusted  
991 to remove between-participants variance. **C.** Statistical parametric map showing the  
992 cluster (pseudoword > word) rendered onto an inflated cortical surface of the Montreal  
993 Neurological Institute (MNI) standard brain thresholded at FWE-corrected cluster-level  
994  $p < 0.05$ , localised to the left STG. **D, E & F.** Post-DP ROI ANOVA on neural signals  
995 and source strength evoked by conditions of interest averaged over the time window  
996 and scalp locations of the significant cluster shown in panel A, B & C. Bars are color-  
997 coded by lexicality and prime type on the  $x$  axis (words, blue frame; pseudowords,  
998 orange frame; unprimed, no fill; primed by same lexicality, consistent fill and frame  
999 colors; primed by different lexicality, inconsistent fill and frame colors). All error bars  
1000 represent  $\pm$  within-participant SE, adjusted to remove between-participants variance.  
1001 Statistical significance from ANOVAs: \*  $p < 0.05$ , \*\*  $p < 0.01$ , \*\*\*  $p < 0.001$ . Statistical  
1002 comparisons shown with solid lines indicate the lexicality by prime-type interaction and  
1003 main effects of prime-type for each lexicality, whereas comparisons with broken lines  
1004 indicate the significance of planned pairwise comparisons.  
1005  
1006

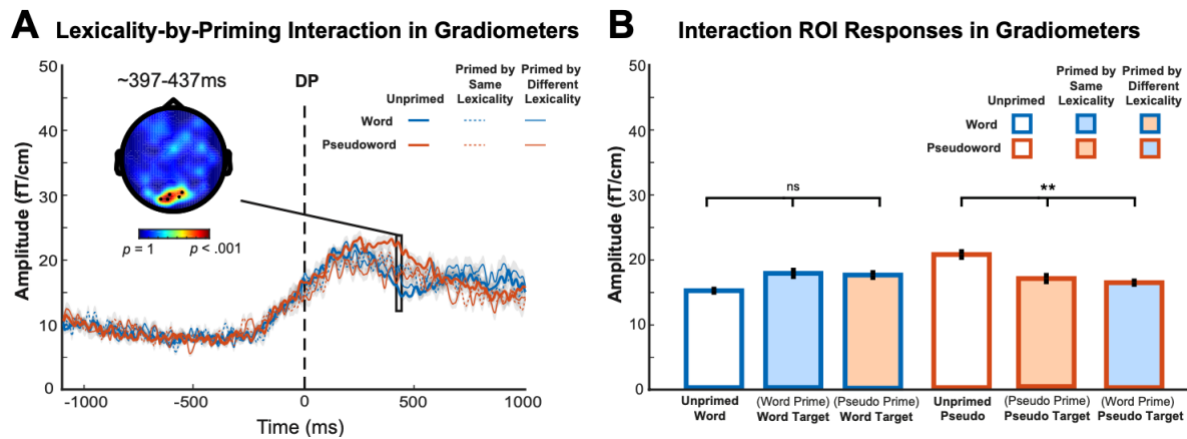

1007

1008

1009

1010

1011

1012

1013

1014

1015

1016

1017

1018

1019

1020

**Figure 7.** Post-DP results showing lexically-by-priming interaction effects in MEG gradiometers. **A.** The topographic plot shows  $F$ -statistics for the statistically significant cluster that showed an interaction between lexicality and prime type. Waveforms represent gradiometer responses averaged over the spatial extent of the significant cluster shown in the topography. The grey shade of waveforms represents  $\pm$  within-participant SE, adjusted to remove between-participants variance. **B.** Gradiometer signals evoked by conditions of interest averaged over temporal and spatial extent of the significant cluster in panel A. All error bars represent  $\pm$  within-participant SE, adjusted to remove between-participants variance. Statistical significance: \*\*  $p < 0.01$ . The statistical comparison lines indicate main effects of prime type for each lexicality. The lexicality by prime-type interaction is statistically reliable as expected based on the defined cluster.

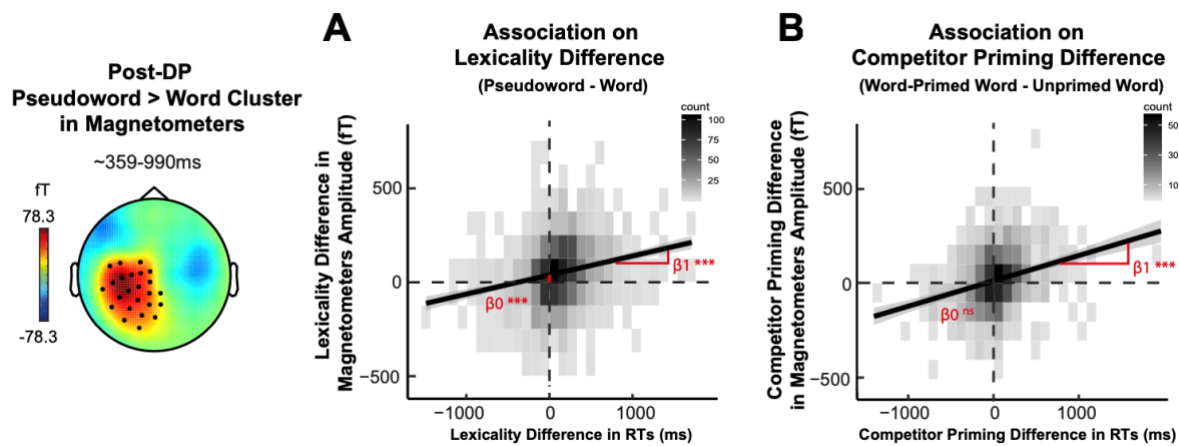

1021

1022 **Figure 8.** Single-trial linear mixed-effect models which accounted for random

1023 intercepts and slopes for participants and stimuli sets (grouped by initial segments)

1024 were constructed to compute the relationship between RTs and magnetometers on **(A)**

1025 lexicality difference (i.e. between pseudowords and words, collapsed over unprimed

1026 and primed conditions) and **(B)** competitor priming difference (i.e. between word-

1027 primed word and unprimed word conditions). Magnetometer responses were

1028 averaged over the time window and scalp locations of the significant post-DP

1029 pseudoword>word cluster (see Figure 6).  $\beta_1$  refers to the model slope,  $\beta_0$  refers to

1030 the model intercept. Statistical significance: \*\*\*  $p < 0.001$ .

1031

1032
